# Supplementary material
Source: Springer Nature journal article supplement (https://www.springermedizin.de/resource/supplementary/12876_2012_805_MOESM4_ESM.pdf/9437548)
Supplement: MOESM4 [file 9437548]

## Additional file 4: Case Report Form – Admission

|                                  |                                                                                                                                                                                                                                                                                                                      |                          |
|----------------------------------|----------------------------------------------------------------------------------------------------------------------------------------------------------------------------------------------------------------------------------------------------------------------------------------------------------------------|--------------------------|
| <b>ER Attendance bloods</b>      | White blood cell count (WBC): _____(x10 <sup>9</sup> /L)                                                                                                                                                                                                                                                             |                          |
|                                  | Neutrophil granulocytes (% of WCC): _____%                                                                                                                                                                                                                                                                           |                          |
|                                  | CRP: _____(mg/l)                                                                                                                                                                                                                                                                                                     |                          |
| <b>Ultrasound Scan</b>           | Yes                                                                                                                                                                                                                                                                                                                  | <input type="checkbox"/> |
|                                  | No                                                                                                                                                                                                                                                                                                                   | <input type="checkbox"/> |
|                                  | Date and time: __/__/____, __:__ (dd/mm/yyyy, hh:mm)                                                                                                                                                                                                                                                                 |                          |
|                                  | No abnormalities <input type="checkbox"/> , Visualized <input type="checkbox"/> , Thickened <input type="checkbox"/> , free fluid <input type="checkbox"/>                                                                                                                                                           |                          |
|                                  | Other: _____                                                                                                                                                                                                                                                                                                         | <input type="checkbox"/> |
| <b>CT</b>                        | Yes                                                                                                                                                                                                                                                                                                                  | <input type="checkbox"/> |
|                                  | No                                                                                                                                                                                                                                                                                                                   | <input type="checkbox"/> |
|                                  | Date and time: __/__/____, __:__ (dd/mm/yyyy, hh:mm)                                                                                                                                                                                                                                                                 |                          |
|                                  | No abnormalities <input type="checkbox"/> , Visualized <input type="checkbox"/> , fluid <input type="checkbox"/> , fat stranding <input type="checkbox"/> , dilatation <input type="checkbox"/> , wall thickened <input type="checkbox"/> , fecalith <input type="checkbox"/> , perforation <input type="checkbox"/> |                          |
|                                  | Other: _____                                                                                                                                                                                                                                                                                                         | <input type="checkbox"/> |
| <b>Pre-op repeat blood - PSP</b> | Yes                                                                                                                                                                                                                                                                                                                  | <input type="checkbox"/> |
|                                  | No                                                                                                                                                                                                                                                                                                                   | <input type="checkbox"/> |
|                                  | Date and time: __/__/____, __:__ (dd/mm/yyyy, hh:mm)                                                                                                                                                                                                                                                                 |                          |
| <b>Operation</b>                 | Yes                                                                                                                                                                                                                                                                                                                  | <input type="checkbox"/> |
|                                  | No                                                                                                                                                                                                                                                                                                                   | <input type="checkbox"/> |
|                                  | Date and time: __/__/____, __:__ (dd/mm/yyyy, hh:mm)                                                                                                                                                                                                                                                                 |                          |
|                                  | Open (McBurney's incision <input type="checkbox"/> ) , (Midline laparotomy <input type="checkbox"/> )                                                                                                                                                                                                                | <input type="checkbox"/> |
|                                  | Laparoscopic                                                                                                                                                                                                                                                                                                         | <input type="checkbox"/> |
|                                  | Laparoscopic converted to open (McBurney's incision)                                                                                                                                                                                                                                                                 | <input type="checkbox"/> |
|                                  | Laparoscopic converted to open (Midline laparotomy)                                                                                                                                                                                                                                                                  | <input type="checkbox"/> |
|                                  | Other: _____                                                                                                                                                                                                                                                                                                         | <input type="checkbox"/> |
| <b>Intra-op findings</b>         | Appendix normal                                                                                                                                                                                                                                                                                                      | <input type="checkbox"/> |
|                                  | Acute appendicitis                                                                                                                                                                                                                                                                                                   | <input type="checkbox"/> |
|                                  | Gangrenous appendicitis                                                                                                                                                                                                                                                                                              | <input type="checkbox"/> |
|                                  | Perforated appendicitis or phlegmon                                                                                                                                                                                                                                                                                  | <input type="checkbox"/> |
|                                  | Periappendicular abscess                                                                                                                                                                                                                                                                                             | <input type="checkbox"/> |
|                                  | Other: _____                                                                                                                                                                                                                                                                                                         | <input type="checkbox"/> |
| <b>Complications</b>             | No complications                                                                                                                                                                                                                                                                                                     | <input type="checkbox"/> |
|                                  | Grade I                                                                                                                                                                                                                                                                                                              | <input type="checkbox"/> |
|                                  | Grade II (medications only)                                                                                                                                                                                                                                                                                          | <input type="checkbox"/> |
|                                  | Grade IIIa (intervention under local anesthetic)                                                                                                                                                                                                                                                                     | <input type="checkbox"/> |
|                                  | Grade IIIb (intervention under general anesthesia)                                                                                                                                                                                                                                                                   | <input type="checkbox"/> |
|                                  | Grade IVa (organ failure, admission to ICU)                                                                                                                                                                                                                                                                          | <input type="checkbox"/> |
|                                  | Grade IVb (multi-organ failure, admission to ICU)                                                                                                                                                                                                                                                                    | <input type="checkbox"/> |
|                                  | Grade V (Death)                                                                                                                                                                                                                                                                                                      | <input type="checkbox"/> |
| <b>Type of complication</b>      | Highest grade: _____                                                                                                                                                                                                                                                                                                 |                          |
| <b>Date of discharge</b>         | Yes, with operation <input type="checkbox"/> , without operation <input type="checkbox"/>                                                                                                                                                                                                                            | <input type="checkbox"/> |
|                                  | Date and time: __/__/____, __:__ (dd/mm/yyyy, hh:mm)                                                                                                                                                                                                                                                                 |                          |
|                                  | No (death): __/__/____, __:__ (dd/mm/yyyy, hh:mm)                                                                                                                                                                                                                                                                    | <input type="checkbox"/> |
| <b>Histopathology report</b>     | Appendix normal                                                                                                                                                                                                                                                                                                      | <input type="checkbox"/> |
|                                  | Acute appendicitis                                                                                                                                                                                                                                                                                                   | <input type="checkbox"/> |
|                                  | Gangrenous appendicitis                                                                                                                                                                                                                                                                                              | <input type="checkbox"/> |
|                                  | Perforated appendicitis or phlegmon                                                                                                                                                                                                                                                                                  | <input type="checkbox"/> |
|                                  | Periappendicular abscess                                                                                                                                                                                                                                                                                             | <input type="checkbox"/> |
|                                  | Other: _____                                                                                                                                                                                                                                                                                                         | <input type="checkbox"/> |
